# Supplementary material
Source: MDPI journal article supplement (https://www.mdpi.com/2076-3417/8/11/2217)
Supplement: s1 [file s1]

# **Supplementary Material**

## **Scandium Doping Effect on the Layered Perovskite Cathode for Low-temperature Solid Oxide Fuel Cells (LT-SOFCs)**

Donghwi Jeong<sup>1</sup>, Junyoung Kim<sup>1</sup>, Ohhun Kwon<sup>1</sup>, Chaehyun Lim<sup>1</sup>, Sivaprakash  
Sengodan<sup>1\*</sup>, Jeeyoung Shin<sup>2\*</sup> and Guntae Kim<sup>1\*</sup>

<sup>1</sup>Department of Energy Engineering, Ulsan National Institute of Science and Technology (UNIST), South  
Korea

<sup>2</sup>Division of Mechanical Systems Engineering, Sookmyung Women's University, South Korea

\* Corresponding author.

Email address: shiva05@unist.ac.kr (S.S.); jshin@sookmyung.ac.kr (J.S.); gtkim@unist.ac.kr (G.K.)

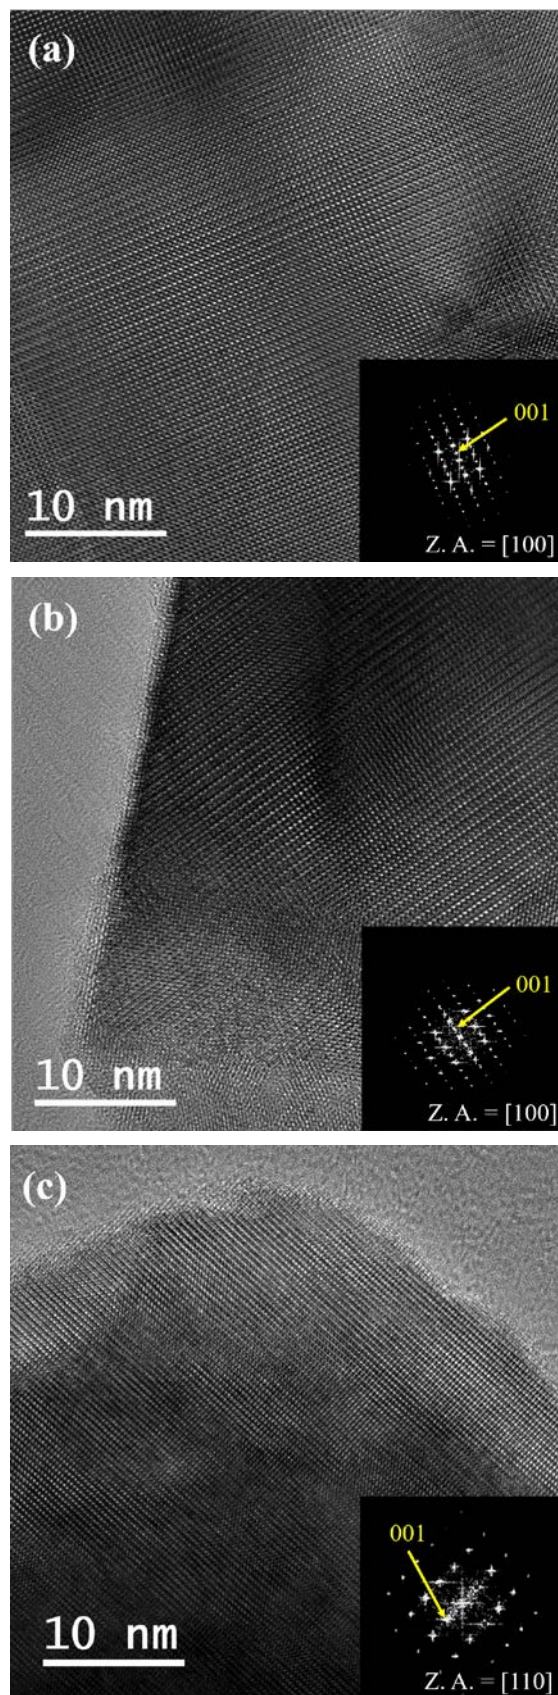

**Figure S1.** The high-resolution transmission electron microscopy (HR TEM) images of (a) PBCO, (b) PBCSc, and (c) SP-PBCSc.

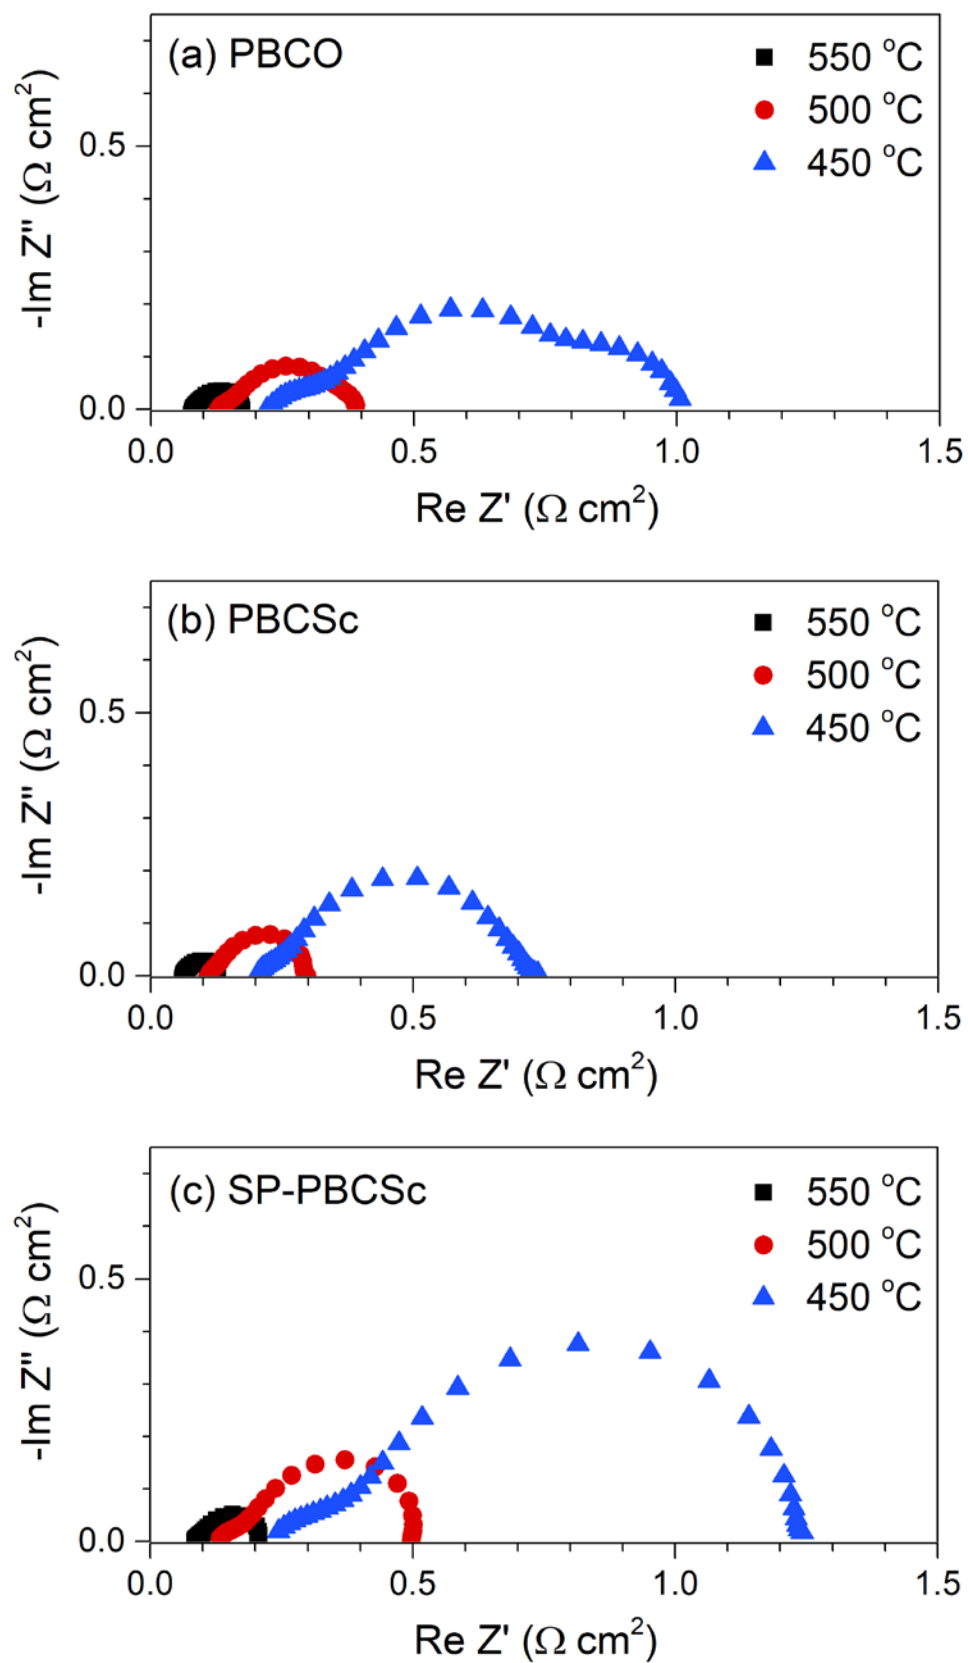

**Figure S2.** Impedance spectra of single cells (Cathode / GDC / Ni-GDC) in a temperature range of 450 to 550 °C: (a) PBCO, (b) PBCSc and (c) SP-PBCSc, respectively.
